# Supplementary material
Source: HighWire-hosted journal article supplement (https://jnm.snmjournals.org/highwire/filestream/95483/field_highwire_adjunct_files/0/222026_Supplemental_Data.pdf)
Supplement: 222026_Supplemental_Data.pdf [file 222026_Supplemental_Data.pdf]

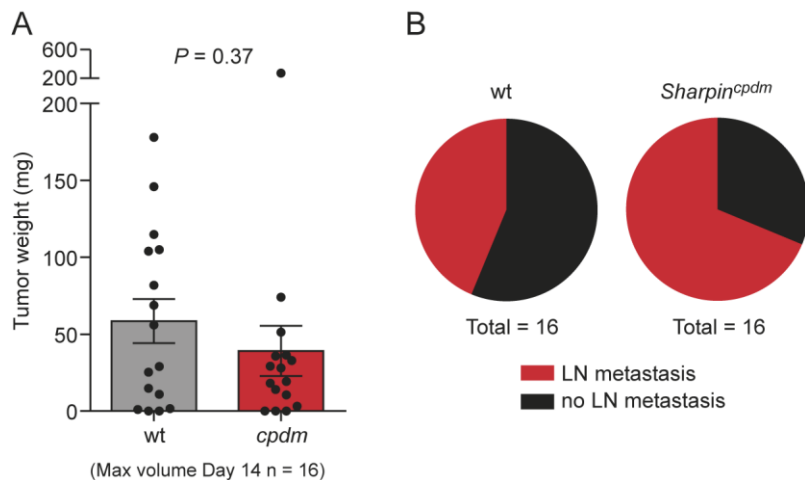

**SUPPLEMENTAL FIGURE 1.** SHARPIN deficiency increases the risk of lymph node metastasis. (A) Subcutaneous B16 melanoma primary tumor weights after a 14 days follow-up period. (B) Pie-chart presenting lymph node metastasis rates in wt and *Sharpin<sup>cpdm</sup>* mice. Red indicates lymph node metastasis, and black indicates no metastasis ( $P = 0.29$ ; Fischer's exact test).

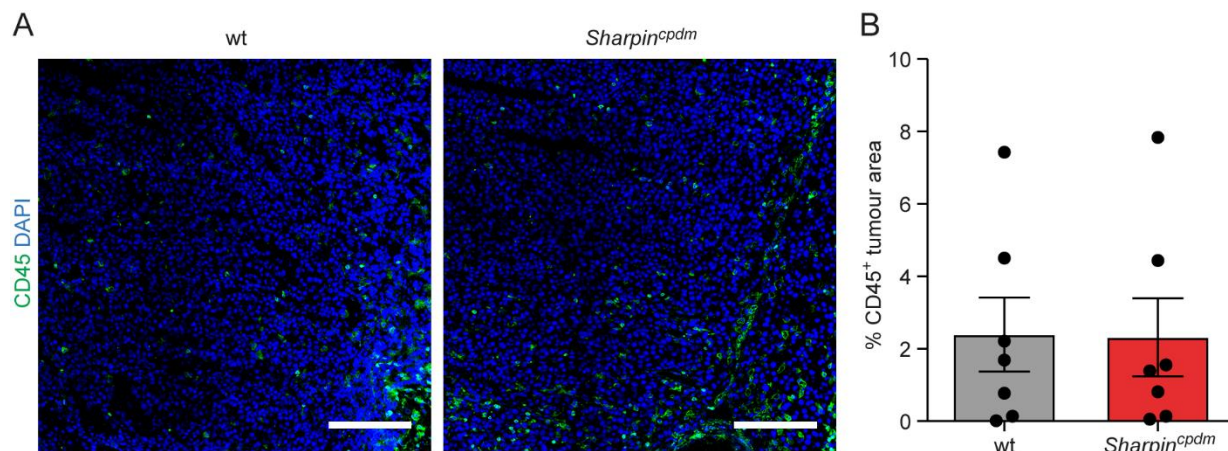

**SUPPLEMENTAL FIGURE 2.** Immunofluorescence staining of B16 tumor leukocytes in wt and *Sharpin<sup>cpdm</sup>* mice. (A) Whole anti-CD45 (clone 30-F11) labeled tumor cryosections at 9 days post-inoculation were imaged with a confocal microscope (10× objective). Nuclei were labeled with 4',6-diamidino-2-phenylindole (DAPI). A representative area from each close to the tumor edge is shown. (B) The percentage of CD45-positive tumor area was quantified from each sample (n=7 mice; mean±SEM). Scale bar, 200  $\mu$ m.

**SUPPLEMENTAL TABLE 1.** Primary antibodies and detection methods used for immunofluorescence stainings.

| Antibody                                                                                                               | Clone                                                    | Dose         | Dilution | Manufacturer                              | Detection                                                                    |
|------------------------------------------------------------------------------------------------------------------------|----------------------------------------------------------|--------------|----------|-------------------------------------------|------------------------------------------------------------------------------|
| CD31                                                                                                                   | Rabbit polyclonal anti-mouse CD31, RB10333               |              | 1:200    | Thermo Fisher Scientific                  | Donkey anti-rabbit IgG Alexa Fluor 488; Invitrogen, A21206                   |
| $\beta_3$ integrin                                                                                                     | Rabbit monoclonal anti-mouse $\beta_3$ integrin, ab75872 |              | 1:200    | Abcam                                     | Donkey anti-rabbit IgG Alexa Fluor 488; Invitrogen, A21206                   |
| VAP-1                                                                                                                  | Rat monoclonal anti-mouse VAP-1, 7-88                    | i.v. 1 mg/kg |          | Uncommercial, Sirpa Jalkanen's laboratory | Goat anti-rat IgG Alexa Fluor 488; Invitrogen, A11006                        |
| CD45                                                                                                                   | FITC-conjugated rat monoclonal anti-mouse CD45, BD553079 |              | 1:50     | BD Biosciences                            |                                                                              |
|                                                                                                                        |                                                          |              |          |                                           | Mounting medium: ProLong Gold antifade reagent with DAPI; Invitrogen, P36935 |
| CD31, endothelial cell marker; VAP-1, vascular adhesion protein-1; CD45, leukocyte common antigen; i.v., intravenously |                                                          |              |          |                                           |                                                                              |
